# Supplementary material
Source: Springer Nature journal article supplement (https://www.springermedizin.de/resource/supplementary/12889_2007_976_MOESM1_ESM.pdf/9503172)

—●— Male —○— Female

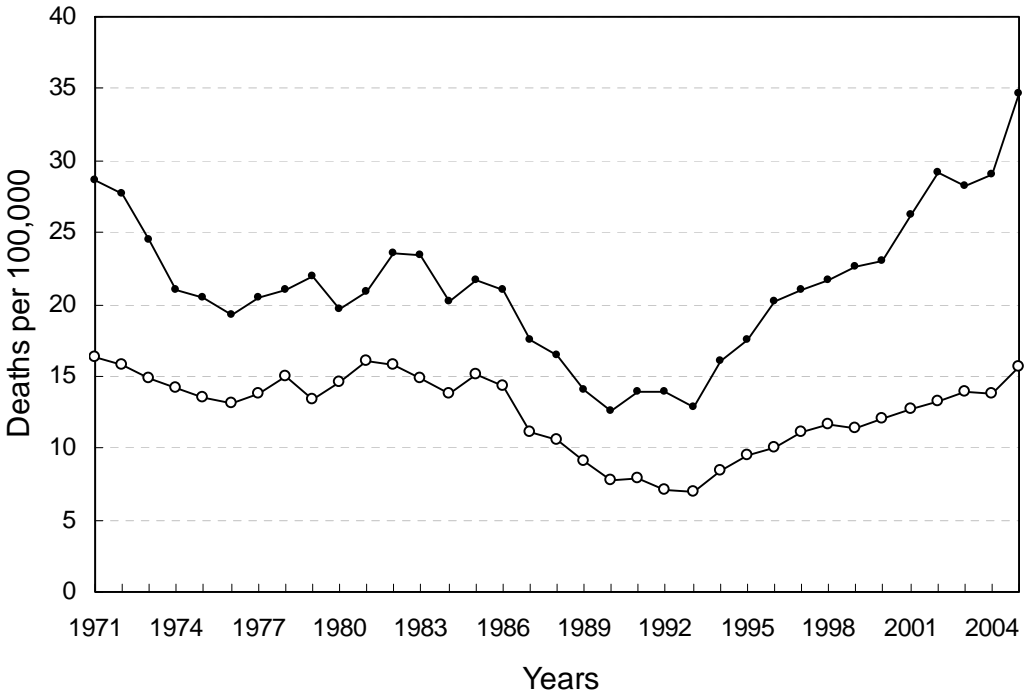

Supplement: MOESM1 [file 9503172]
